# Supplementary material
Source: publisher site journal article supplement (https://www.spandidos-publications.com/7150/downloadSupplementary)
Supplement: Supplementary file 1 [file downloadSupplementary]

## Sheet: Sheet1
Table SIII. FANCE expression in OSCC samples categorized by cluster analysis
ID	Cluster	Expression
TCGA4PAA8J	2	8.8165
TCGABA4074	2	8.2512
TCGABA4075	1	9.5809
TCGABA5149	1	9.2771
TCGABA5151	1	8.0895
TCGABA5152	1	8.5829
TCGABA5556	1	8.77
TCGABA5557	1	8.6613
TCGABA5558	1	8.2949
TCGABA6872	1	9.2167
TCGABA6873	1	9.5142
TCGABA7269	2	8.7885
TCGABAA6D8	2	8.037
TCGABAA6DB	2	8.4004
TCGABAA6DD	1	9.3824
TCGABAA6DE	1	9.1644
TCGABAA6DG	2	8.526
TCGABAA6DJ	1	9.7365
TCGABB4224	1	10.6161
TCGABB7863	1	8.7937
TCGABB7872	1	8.6207
TCGABB8601	1	10.0341
TCGABBA5HU	1	8.9941
TCGABBA5HZ	1	8.7788
TCGABBA6UO	1	8.9001
TCGAC9A47Z	1	9.4592
TCGAC9A480	1	8.7491
TCGACN4725	1	9.2804
TCGACN4726	1	9.5194
TCGACN4728	2	8.2513
TCGACN4729	1	8.9286
TCGACN4730	1	9.3141
TCGACN4731	1	9.8599
TCGACN4733	2	8.3701
TCGACN4734	1	8.84
TCGACN4736	2	9.1532
TCGACN4737	2	8.7849
TCGACN4740	2	8.4772
TCGACN4741	2	10.0633
TCGACN4742	2	9.0544
TCGACN5358	2	8.6243
TCGACN5359	2	8.5793
TCGACN5364	2	9.1893
TCGACN5367	2	9.8722
TCGACN5369	2	9.3037
TCGACN5370	2	8.8906
TCGACN5373	2	8.9742
TCGACN6011	1	10.7057
TCGACN6013	2	8.3189
TCGACN6016	2	8.5995
TCGACN6017	2	7.2273
TCGACN6018	2	8.9637
TCGACN6019	2	8.9875
TCGACN6020	1	9.2708
TCGACN6024	2	9.2835
TCGACN6994	2	9.0033
TCGACN6995	1	9.7003
TCGACN6996	2	8.9112
TCGACN6998	1	8.1816
TCGACNA49A	2	9.7064
TCGACNA63V	2	7.9884
TCGACNA642	1	9.1052
TCGACQ5323	1	9.8334
TCGACQ5324	1	8.9922
TCGACQ5325	2	8.1371
TCGACQ5326	1	9.1687
TCGACQ5327	1	8.7046
TCGACQ5329	2	9.4176
TCGACQ5330	2	8.3362
TCGACQ5331	1	8.725
TCGACQ5332	2	9.1909
TCGACQ5333	2	8.1348
TCGACQ5334	1	9.0659
TCGACQ6218	1	8.2277
TCGACQ6219	2	9.154
TCGACQ6220	1	9.6287
TCGACQ6221	2	7.4431
TCGACQ6222	2	8.4233
TCGACQ6223	1	8.9954
TCGACQ6224	2	8.4247
TCGACQ6225	1	9.3861
TCGACQ6227	2	8.4035
TCGACQ6228	2	9.966
TCGACQ6229	1	9.0003
TCGACQ7063	1	8.9005
TCGACQ7065	1	9.08
TCGACQ7067	2	9.4026
TCGACQ7068	1	9.311
TCGACQ7069	1	7.4372
TCGACQ7071	1	9.0379
TCGACQ7072	2	8.5966
TCGACQA4C6	1	8.4612
TCGACQA4C7	2	8.4978
TCGACQA4C9	2	9.6779
TCGACQA4CA	2	9.9981
TCGACQA4CB	2	9.133
TCGACQA4CD	1	9.3409
TCGACQA4CE	1	8.4594
TCGACQA4CG	1	8.8947
TCGACQA4CH	1	8.3622
TCGACQA4CI	2	9.8624
TCGACR6471	1	9.5646
TCGACR6484	2	8.3864
TCGACR6488	2	7.7109
TCGACR6491	1	9.6346
TCGACR6492	1	8.4737
TCGACR6493	1	9.0257
TCGACR7365	1	9.282
TCGACR7367	2	7.741
TCGACR7368	1	10.247
TCGACR7369	1	9.2133
TCGACR7372	2	8.9118
TCGACR7373	1	8.4317
TCGACR7376	2	7.6706
TCGACR7377	2	7.8275
TCGACR7379	2	7.9549
TCGACR7380	1	8.6205
TCGACR7382	2	7.7571
TCGACR7386	2	8.3435
TCGACR7390	1	9.4432
TCGACR7391	2	8.143
TCGACR7392	2	8.1595
TCGACR7393	2	7.8231
TCGACR7394	2	8.1337
TCGACR7395	1	9.0287
TCGACR7397	2	7.8437
TCGACR7401	2	8.5414
TCGACV5436	1	8.1815
TCGACV5442	1	9.7119
TCGACV5966	1	8.743
TCGACV5970	2	8.083
TCGACV5971	2	7.6748
TCGACV5973	1	8.0239
TCGACV5976	1	9.531
TCGACV5977	1	8.3935
TCGACV5979	1	8.9714
TCGACV6003	1	8.6523
TCGACV6433	1	9.7315
TCGACV6436	1	7.8861
TCGACV6441	2	8.7423
TCGACV6933	2	10.3005
TCGACV6934	2	8.1844
TCGACV6936	1	8.9885
TCGACV6937	2	9.8033
TCGACV6938	1	8.2434
TCGACV6939	2	9.7194
TCGACV6940	2	9.0882
TCGACV6941	2	9.3321
TCGACV6942	2	8.6581
TCGACV6945	1	9.7529
TCGACV6948	2	8.805
TCGACV6951	2	9.053
TCGACV6952	1	9.2117
TCGACV6953	1	8.7148
TCGACV6954	1	10.104
TCGACV6955	1	8.6787
TCGACV6956	1	10.1001
TCGACV6959	2	9.5257
TCGACV6960	1	8.4057
TCGACV6961	2	8.95
TCGACV7090	1	8.3096
TCGACV7091	1	8.7597
TCGACV7095	1	9.0368
TCGACV7097	2	9.1986
TCGACV7099	1	8.5356
TCGACV7100	1	9.5433
TCGACV7102	2	9.9415
TCGACV7103	2	7.8021
TCGACV7104	2	8.6761
TCGACV7178	2	9.3227
TCGACV7180	1	8.7774
TCGACV7183	1	8.9988
TCGACV7235	2	10.0016
TCGACV7236	2	7.999
TCGACV7238	2	7.9686
TCGACV7243	2	8.8473
TCGACV7252	1	9.2363
TCGACV7253	1	9.436
TCGACV7254	2	8.5251
TCGACV7255	1	9.3218
TCGACV7263	2	9.2153
TCGACV7407	2	9.7426
TCGACV7409	1	7.3346
TCGACV7411	1	9.4594
TCGACV7413	1	8.7066
TCGACV7414	2	8.9542
TCGACV7416	1	8.4458
TCGACV7423	1	8.463
TCGACV7425	1	9.384
TCGACV7427	1	8.2301
TCGACV7428	1	9.7973
TCGACV7429	2	9.2507
TCGACV7432	1	9.3496
TCGACV7434	1	8.8314
TCGACV7435	2	8.2973
TCGACV7438	2	8.7908
TCGACV7446	2	9.0862
TCGACV7568	2	9.9195
TCGACVA45O	1	8.6086
TCGACVA45P	1	8.6975
TCGACVA45Q	1	8.0314
TCGACVA45R	2	9.039
TCGACVA45T	2	8.3482
TCGACVA45U	2	9.7014
TCGACVA45V	1	8.9298
TCGACVA45X	1	8.5813
TCGACVA463	1	9.0276
TCGACVA464	2	8.8818
TCGACVA465	1	8.3392
TCGACVA468	2	7.8294
TCGACVA6JD	1	8.4212
TCGACVA6JE	1	8.8381
TCGACVA6JN	1	8.7016
TCGACVA6JO	1	7.94
TCGACVA6JT	2	8.2741
TCGACVA6JU	2	9.7225
TCGACVA6JY	1	9.1285
TCGACVA6JZ	1	9.1503
TCGACVA6K0	2	8.0728
TCGACVA6K2	1	9.0682
TCGACX7082	2	9.2396
TCGACX7085	2	8.2647
TCGACX7086	1	9.084
TCGACX7219	2	8.4704
TCGACXA4AQ	2	9.3375
TCGAD66515	2	7.9427
TCGAD66516	1	8.4708
TCGAD66823	1	9.2947
TCGAD66825	2	8.5557
TCGAD66827	2	9.588
TCGAD68569	1	8.8156
TCGAD6A4Z9	1	9.1811
TCGAD6A4ZB	2	10.5201
TCGAD6A6EM	2	8.8374
TCGAD6A6EN	1	8.4797
TCGAD6A6EO	1	9.4637
TCGADQ5624	2	8.367
TCGADQ5625	2	9.0708
TCGADQ5630	2	9.8313
TCGADQ5631	2	8.1048
TCGADQ7588	1	9.6352
TCGADQ7592	2	9.4248
TCGAF78489	1	9.3978
TCGAF7A50G	1	9.5326
TCGAF7A50J	1	8.4792
TCGAF7A61S	1	8.3939
TCGAF7A61W	1	9.3533
TCGAF7A624	1	8.2403
TCGAH77774	1	9.2518
TCGAH78501	1	9.0079
TCGAH78502	1	9.6861
TCGAH7A6C4	2	8.6862
TCGAHD7831	2	8.646
TCGAHD7832	1	9.5626
TCGAHD7917	1	8.8408
TCGAHD8634	1	8.6277
TCGAHD8635	2	8.7362
TCGAHDA4C1	1	9.0886
TCGAHDA633	1	8.6684
TCGAHDA6HZ	2	8.7308
TCGAHDA6I0	1	9.2476
TCGAHL7533	1	9.3531
TCGAIQ7631	2	8.0637
TCGAIQ7632	1	8.8842
TCGAIQA61E	1	9.7225
TCGAIQA61G	1	10.2944
TCGAIQA61H	2	9.1286
TCGAIQA61J	2	8.6431
TCGAIQA6SG	1	9.8074
TCGAIQA6SH	1	9.4585
TCGAKUA66T	1	10.0402
TCGAKUA6H8	2	8.1741
TCGAMTA51X	1	8.5466
TCGAMTA67A	1	8.1979
TCGAMTA67D	2	8.4115
TCGAMTA67F	1	9.3251
TCGAMTA7BN	2	7.249
TCGAP3A5QA	2	7.4112
TCGAP3A5QF	1	10.0546
TCGAP3A6T0	1	8.5193
TCGAP3A6T2	1	8.9506
TCGAP3A6T3	1	9.7445
TCGAP3A6T4	1	7.8873
TCGAP3A6T5	1	9.6442
TCGAP3A6T6	1	9.7787
TCGAP3A6T7	1	9.2142
TCGAP3A6T8	2	9.5246
TCGAQKA64Z	1	8.7433
TCGAQKA652	2	8.5845
TCGAQKA6IG	1	8.0412
TCGAQKA6IH	1	8.5947
TCGAQKA6II	1	9.512
TCGAQKA6IJ	1	8.7779
TCGAQKA6VB	1	9.5975
TCGAQKA8Z7	2	9.6943
TCGAQKA8Z9	2	9.2593
TCGAQKAA3K	2	8.4497
TCGARSA6TO	2	8.929
TCGAT2A6WX	1	8.7113
TCGAT2A6WZ	1	8.8806
TCGAT2A6X2	1	9.807
TCGAT3A92N	1	8.3836
TCGAUFA719	1	10.6879
TCGAUFA71A	2	9.4651
TCGAUFA71B	1	8.9532
TCGAUFA71E	1	10.0778
TCGAUFA7JA	2	10.033
TCGAUFA7JC	1	9.0991
TCGAUFA7JD	2	8.5956
TCGAUFA7JO	1	9.3065
TCGAUFA7JS	2	9.1523
TCGAUFA7JT	1	8.8149
TCGAUPA6WW	2	9.3067
TCGAWAA7GZ	2	9.8171
TCGAWAA7H4	2	8.9074
